# Supplementary material for: A Novel Approach to the Synthesis of 1,3,4-Thiadiazole-2-amine Derivatives
Source: MDPI journal article supplement (doi:10.3390/molecules26175159), 2021-08-25
Supplement: s1 [file s1]

## Supplementary material

## A novel approach to the synthesis of 1,3,4-thiadiazole-2-amine derivatives

Tatiana S. Kokovina <sup>1,2</sup>, Svyatoslav Y. Gadomsky <sup>1,\*</sup>, Alexey A. Terentiev <sup>1,2,3</sup> and Nataliya A. Sanina <sup>1,2,3</sup>

<sup>1</sup> Institute of Problems of Chemical Physics of the Russian Academy of Sciences, 142432 Chernogolovka, Moscow region, Russian Federation;

<sup>2</sup> Lomonosov Moscow State University, 119991 Moscow, Russian Federation;

<sup>3</sup> Medicinal Chemistry Science and Education Center of Moscow Region State University, 141014 Mytishchi, Russian Federation

\* Correspondence: gadomsky@icp.ac.ru.

## 5-Phenyl-1,3,4-thiadiazol-2-amine (1a)

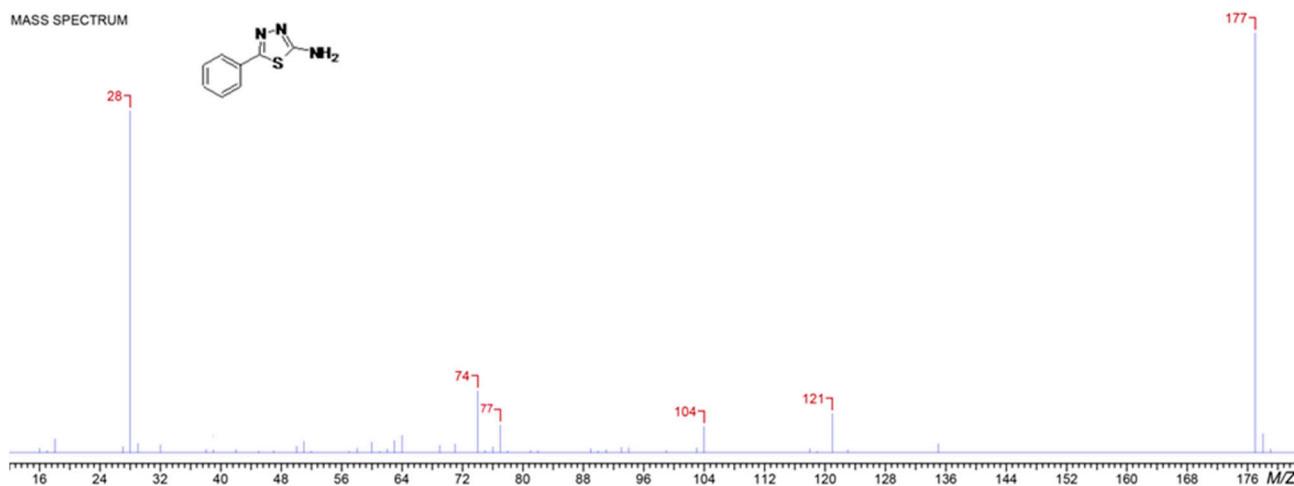

**Figure S1.** Mass spectrum of 5-phenyl-1,3,4-thiadiazol-2-amine (1a).

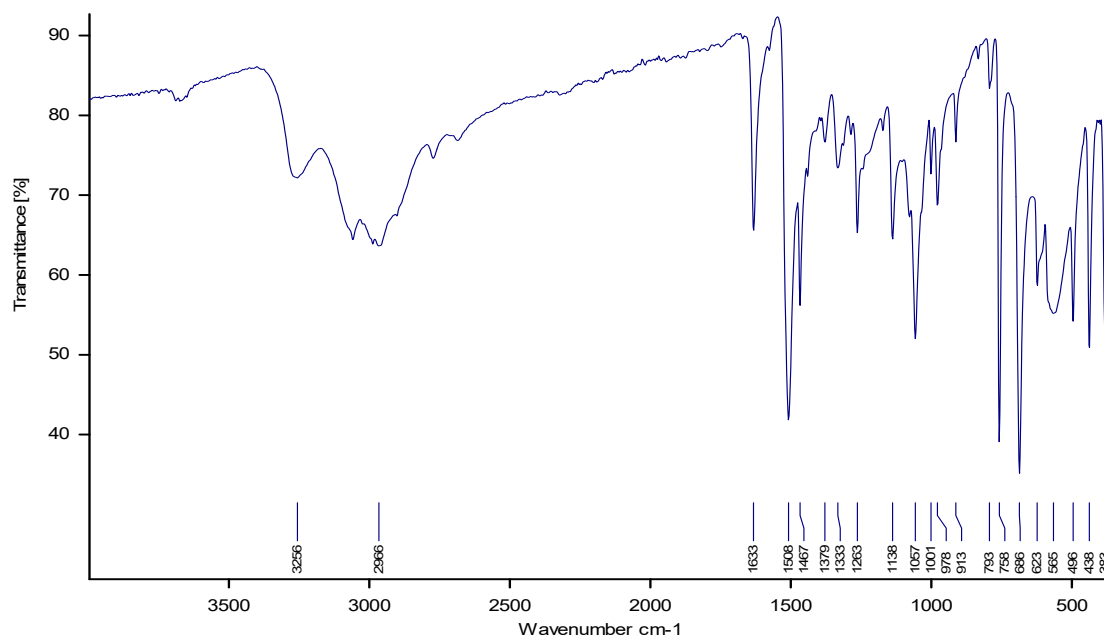

Figure S2. IR spectrum of 5-phenyl-1,3,4-thiadiazol-2-amine (1a).

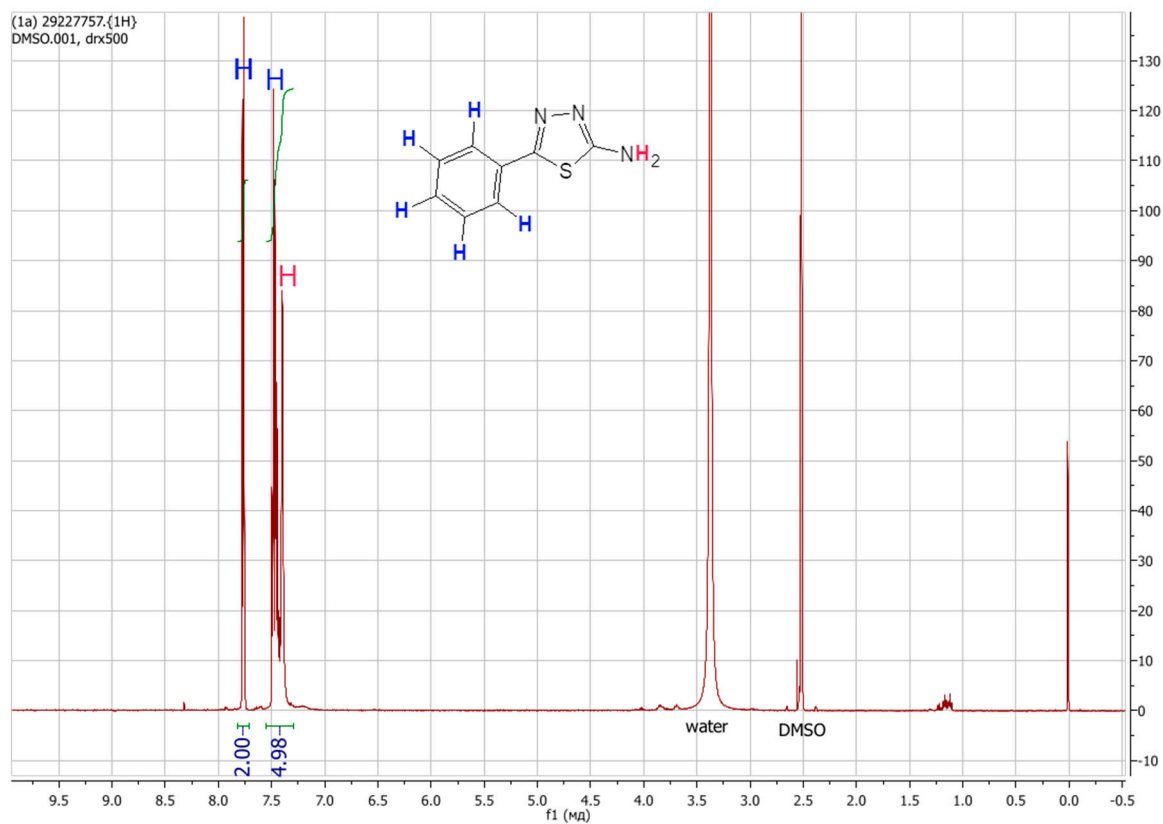

Figure S3. <sup>1</sup>H NMR spectrum (DMSO-*d*<sub>6</sub>) of 5-phenyl-1,3,4-thiadiazol-2-amine (1a).

### 5-(2-Phenylethyl)-1,3,4-thiadiazol-2-amine (1b)

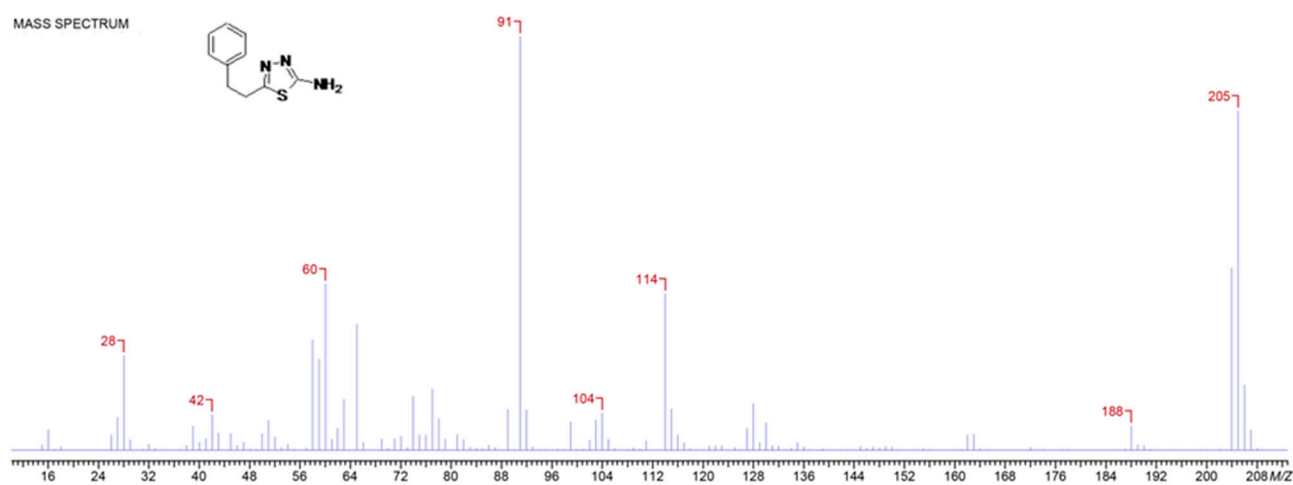

**Figure S4.** Mass spectrum of 5-(2-phenylethyl)-1,3,4-thiadiazol-2-amine (1b).

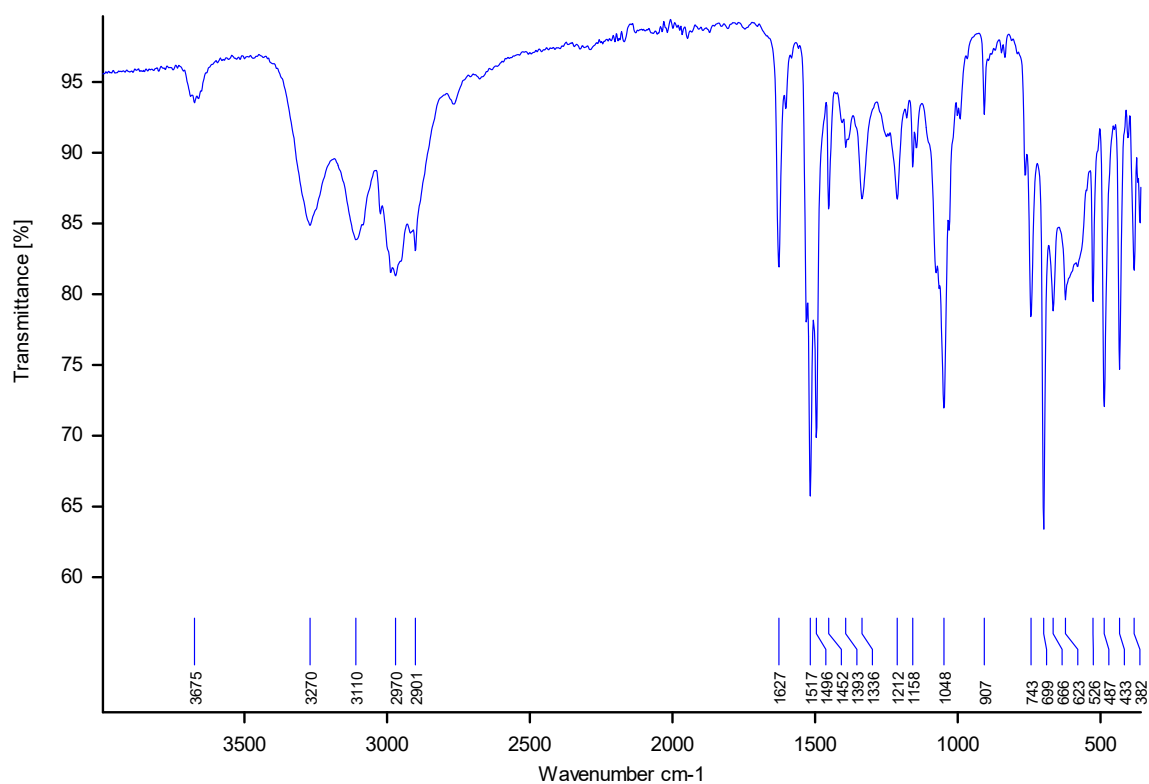

**Figure S5.** IR spectrum of 5-(2-phenylethyl)-1,3,4-thiadiazol-2-amine (1b).

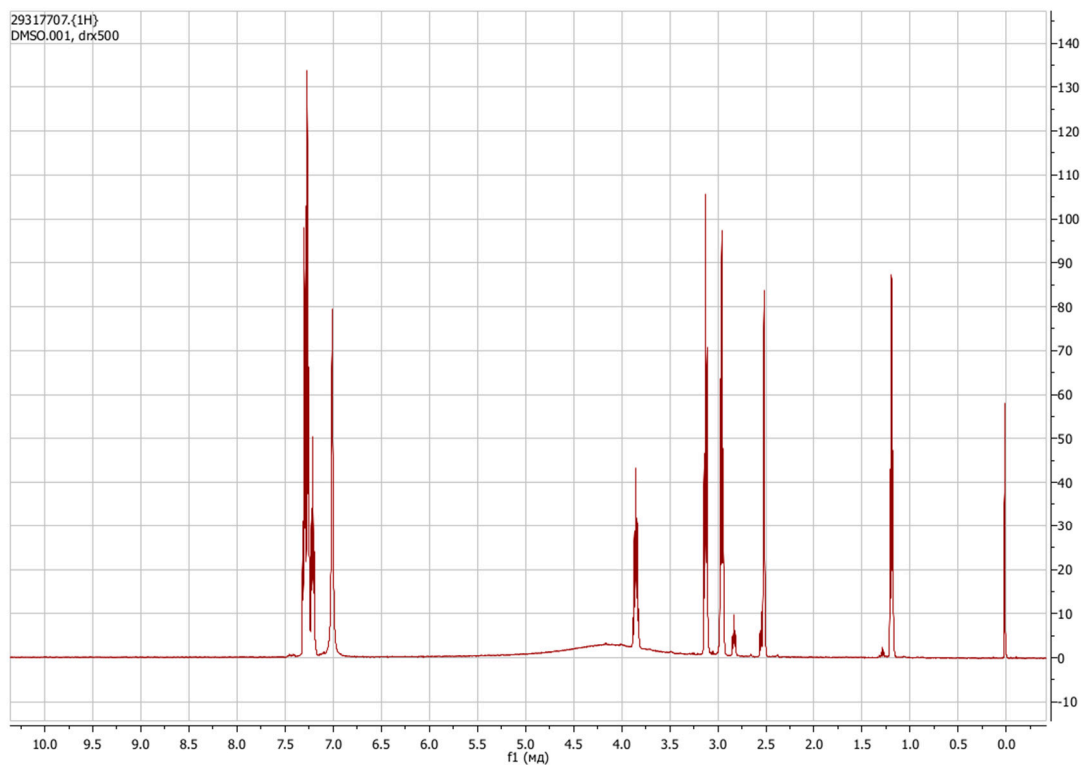

(a)

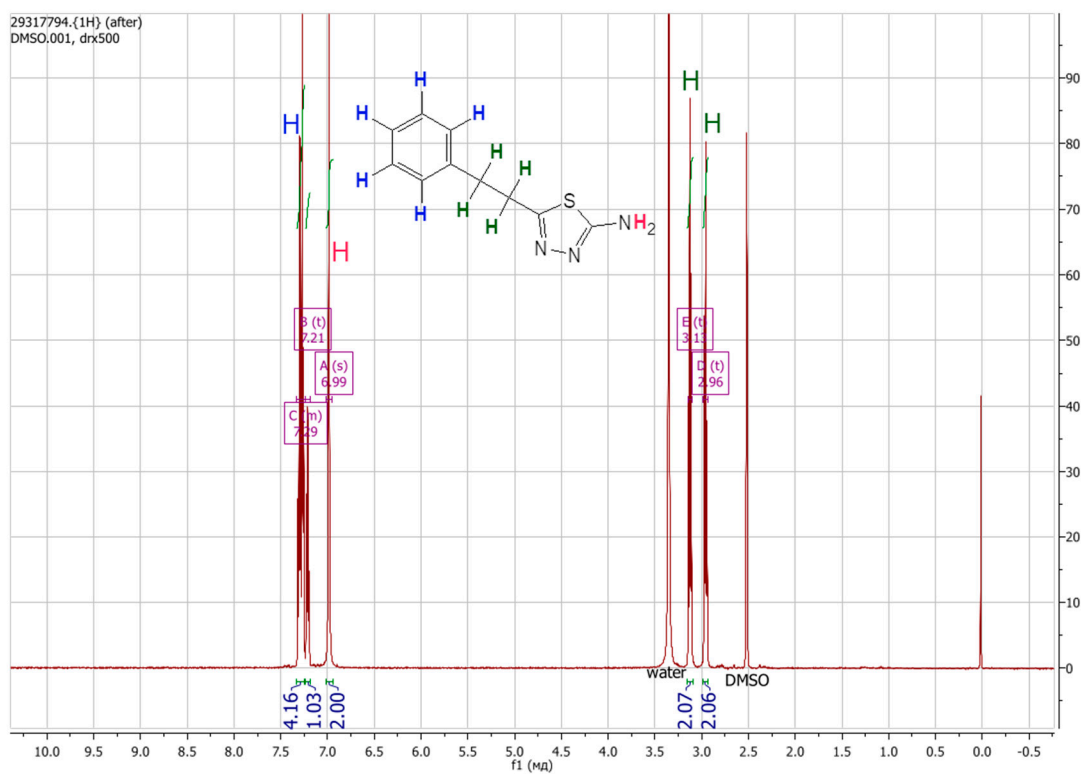

(b)

**Figure S6.**  $^1\text{H}$  NMR spectrum ( $\text{DMSO}-d_6$ ) of 5-(2-phenylethyl)-1,3,4-thiadiazol-2-amine (**1b**) before (a) and after (b) the treatment by hydrochloric acid solution.

### 5-(Phenoxymethyl)-1,3,4-thiadiazol-2-amine (1c)

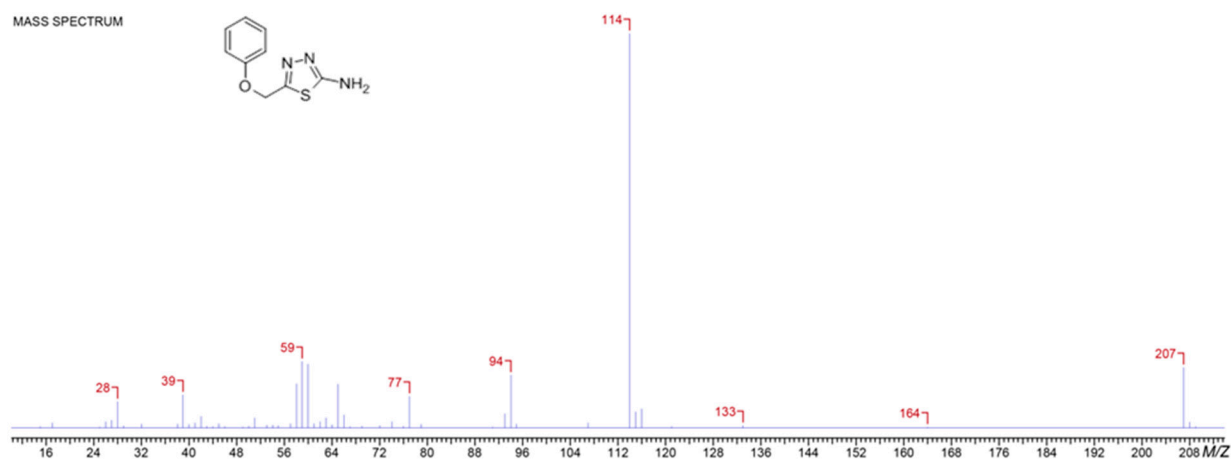

**Figure S7.** Mass spectrum of 5-(phenoxymethyl)-1,3,4-thiadiazol-2-amine (1c).

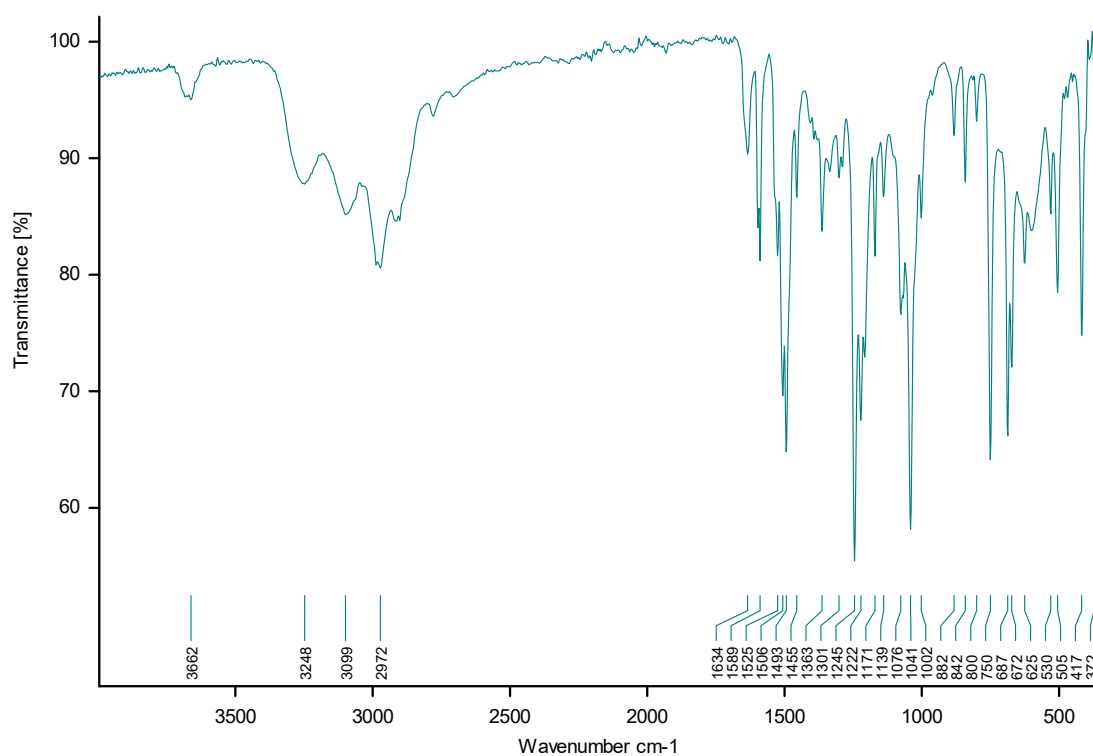

**Figure S8.** IR spectrum of 5-(phenoxymethyl)-1,3,4-thiadiazol-2-amine (1c).

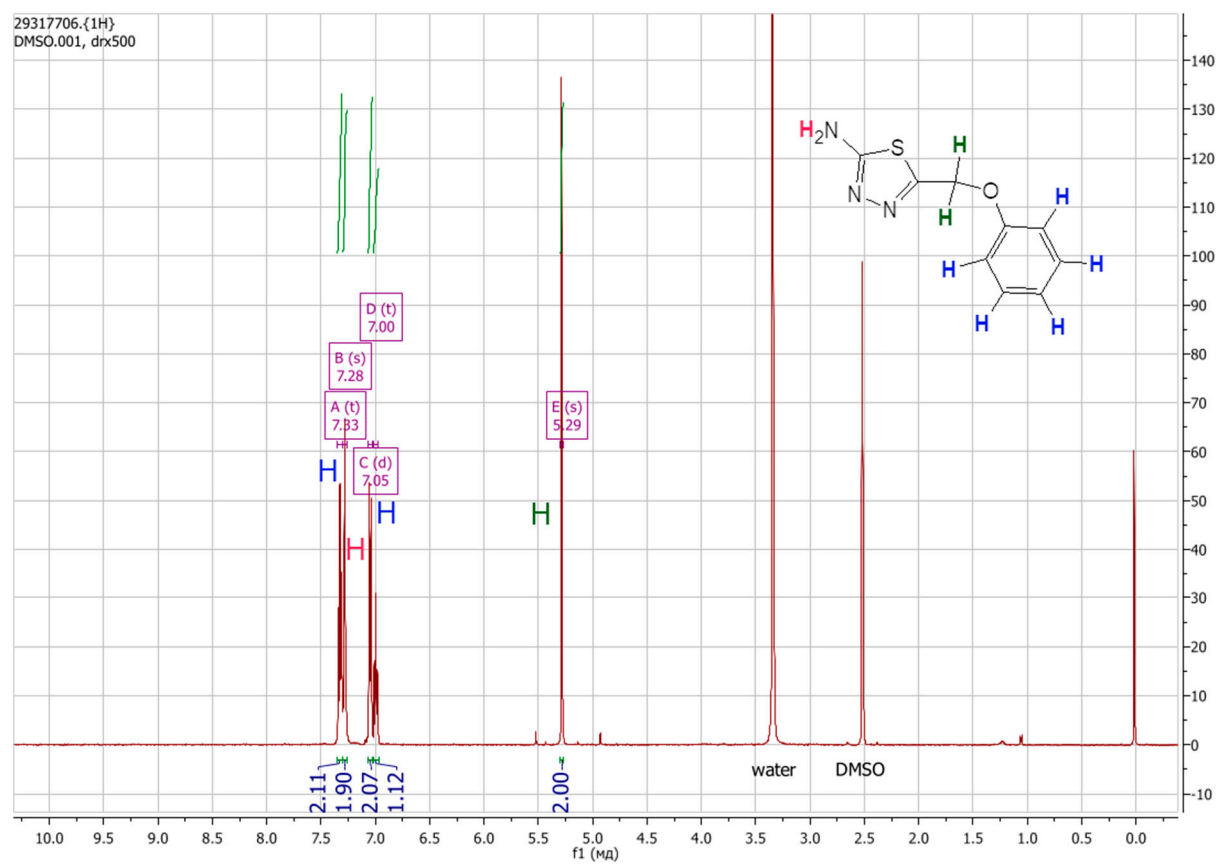

**Figure S9.** <sup>1</sup>H NMR spectrum (DMSO-*d*<sub>6</sub>) of 5-(phenoxymethyl)-1,3,4-thiadiazol-2-amine (1c).

## 5-[(Naphthalen-2-yl)methyl]-1,3,4-thiadiazol-2-amine (1d)

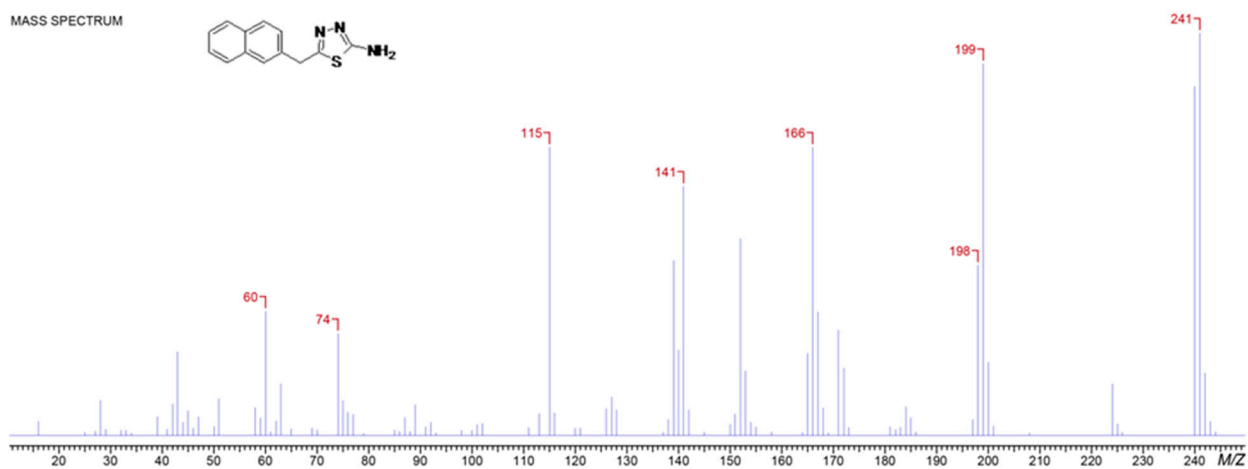

**Figure S10.** Mass spectrum of 5-[(naphthalen-2-yl)methyl]-1,3,4-thiadiazol-2-amine (1d)

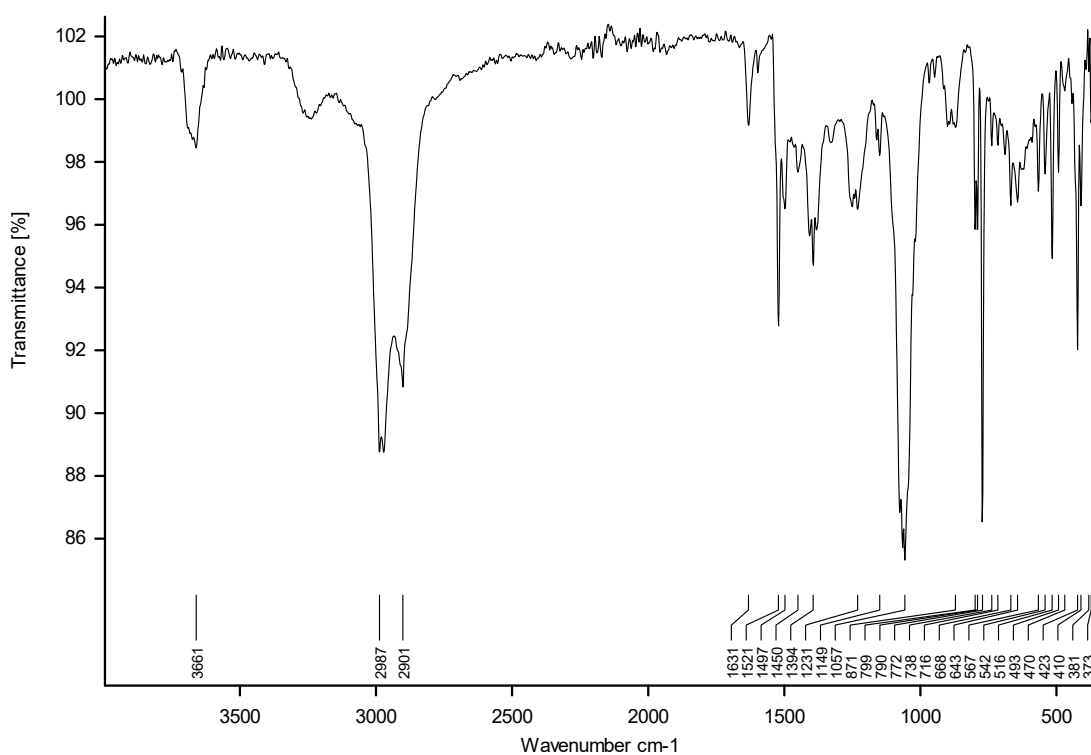

**Figure S11.** IR spectrum of 5-[(naphthalen-2-yl)methyl]-1,3,4-thiadiazol-2-amine (1d)

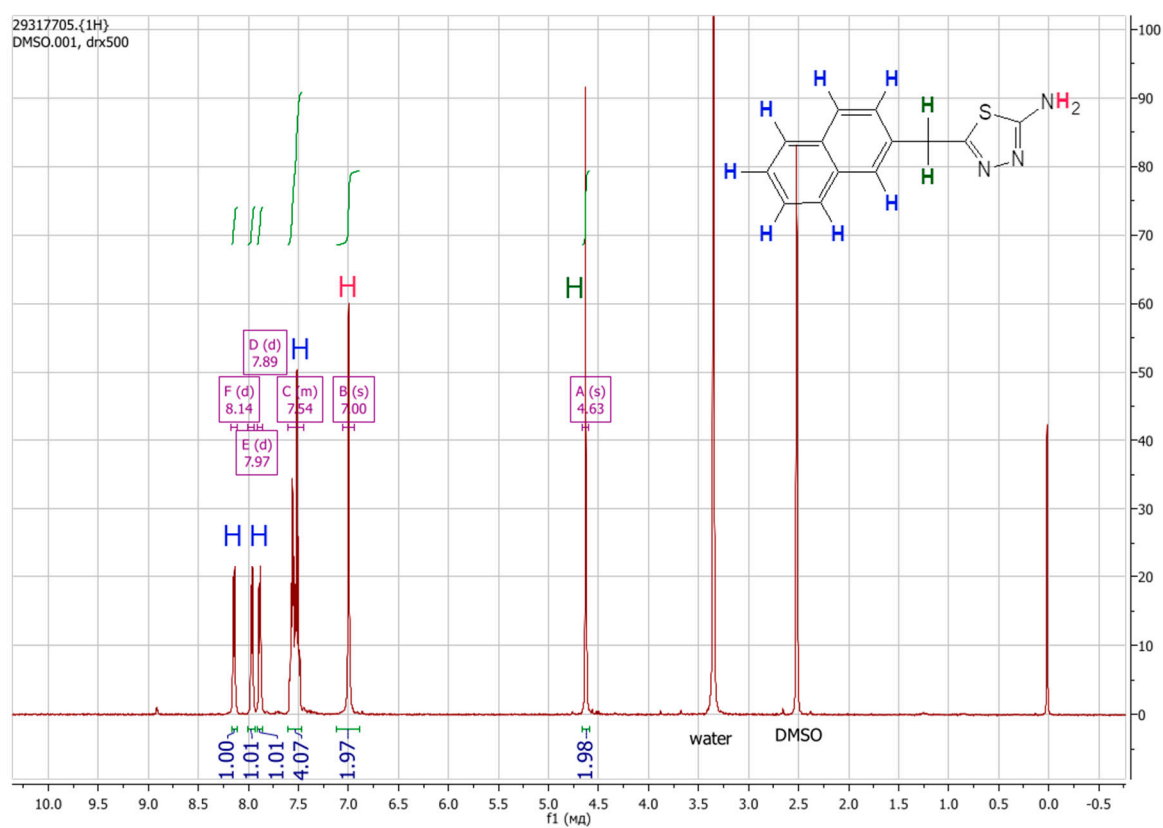

**Figure S12.** <sup>1</sup>H NMR spectrum (DMSO-*d*<sub>6</sub>) of 5-[(naphthalen-2-yl)methyl]-1,3,4-thiadiazol-2-amine (1d)



**5,5'-(Butane-1,4-diyl)di(1,3,4-thiadiazol-2-amine) (1e)**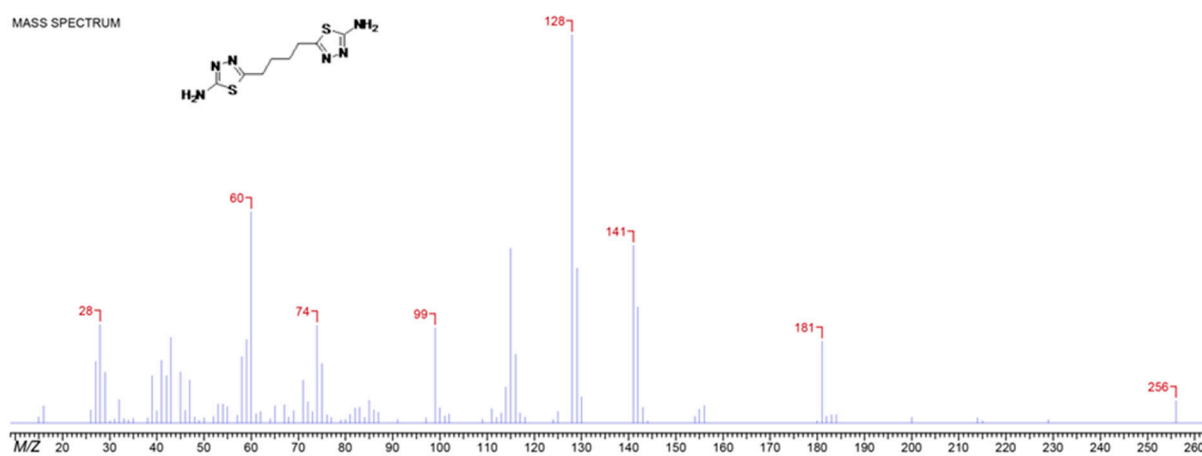**Figure S13.** Mass spectrum of 5,5'-(butane-1,4-diyl)di(1,3,4-thiadiazol-2-amine) (1e)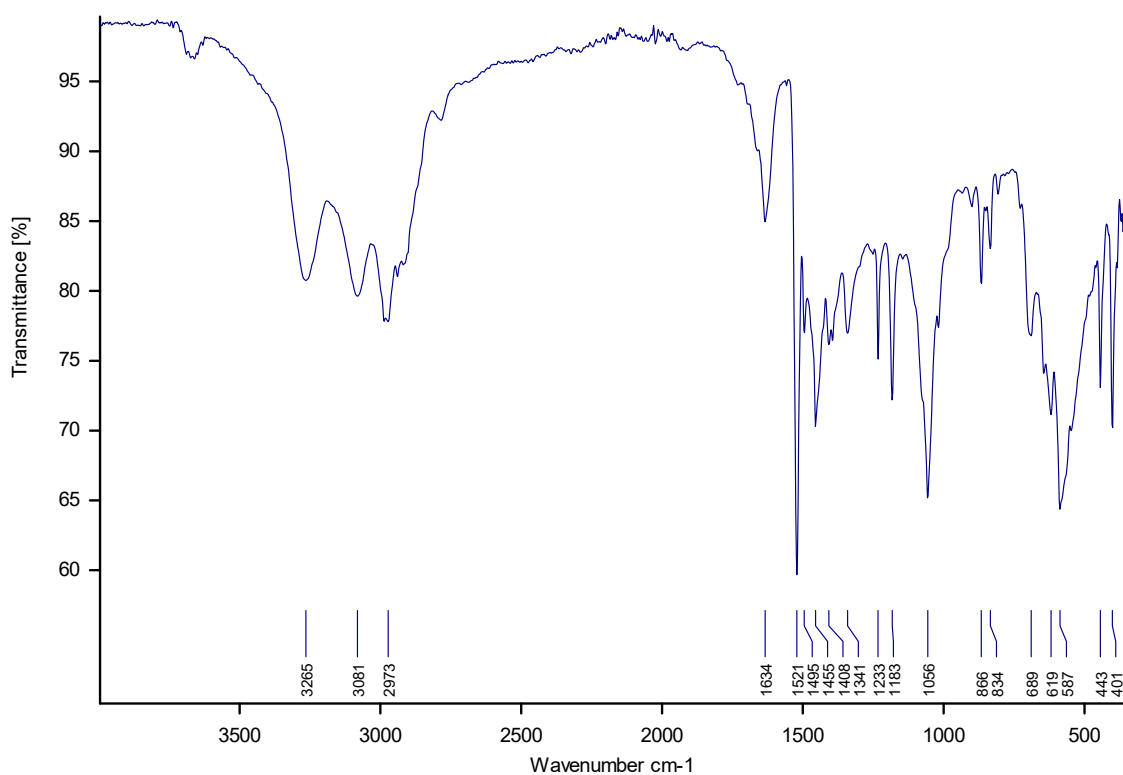**Figure S14.** IR spectrum of 5,5'-(butane-1,4-diyl)di(1,3,4-thiadiazol-2-amine) (1e)

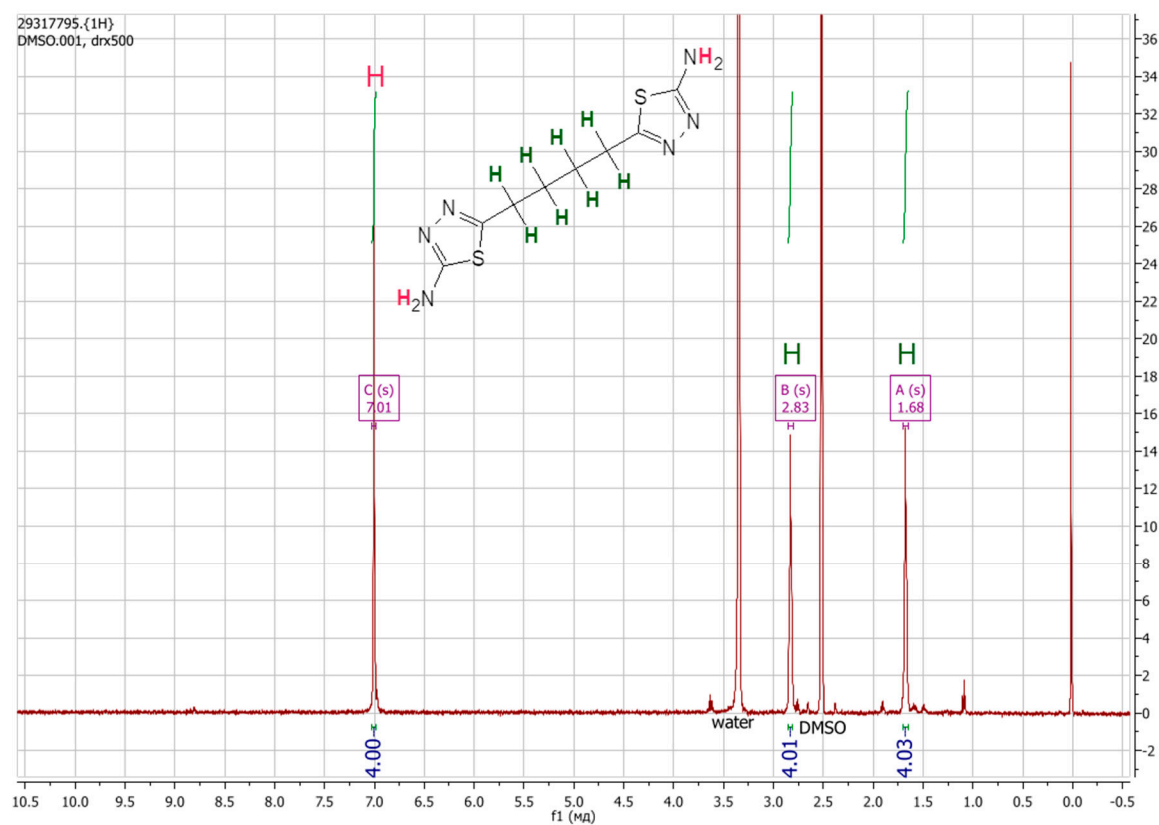

**Figure S15.**  $^1\text{H}$  NMR spectrum ( $\text{DMSO-}d_6$ ) of 5,5'-(butane-1,4-diyl)di(1,3,4-thiadiazol-2-amine) (1e)

## 2-Benzoylhydrazine-1-carbothioamide i-1a

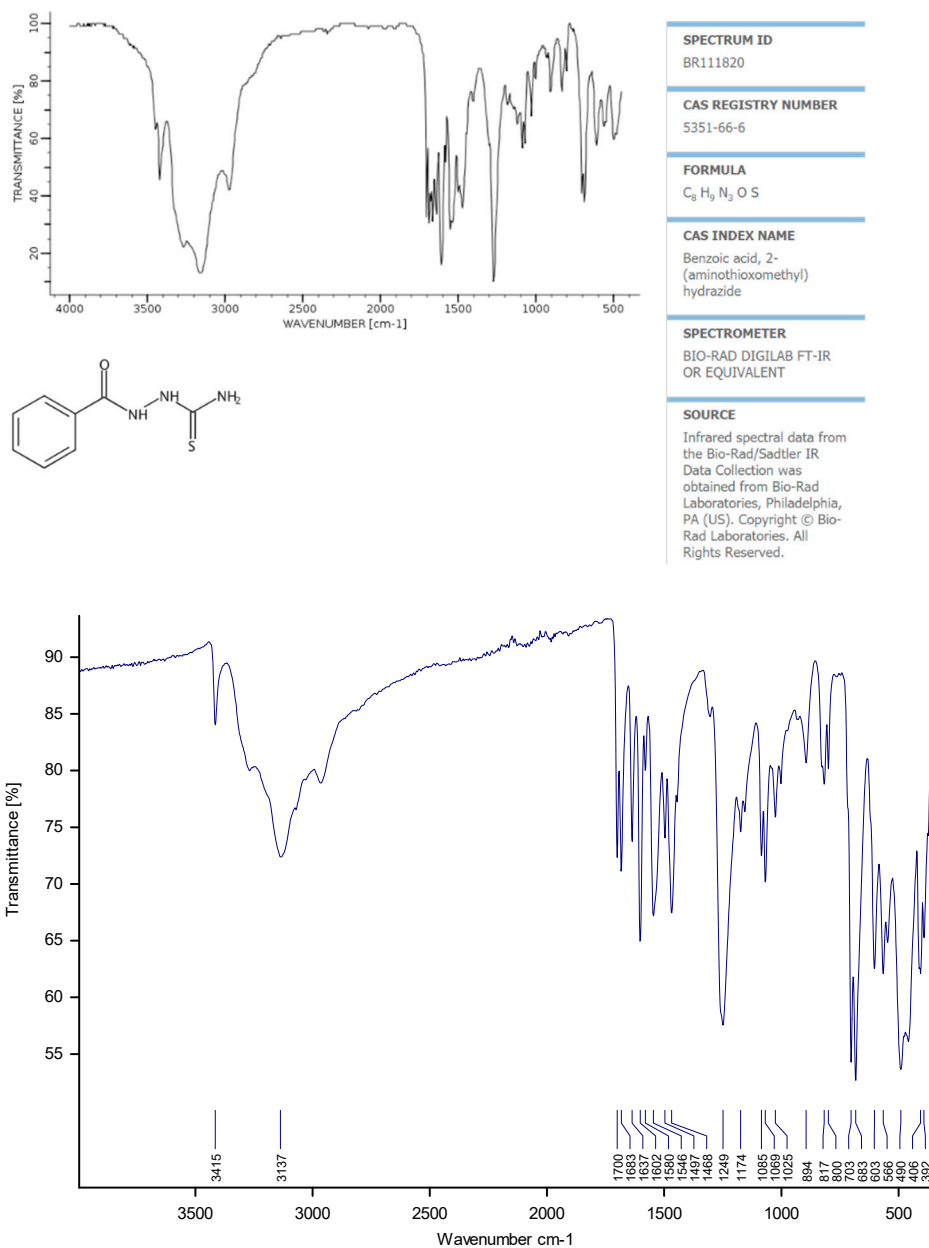

**Figure S16.** IR spectrum of 2-benzoylhydrazine-1-carbothioamide (**i-1a**) and its comparison with BIO-RAD data base (accessed through the Sci-Finder: <https://scifinder.cas.org>)

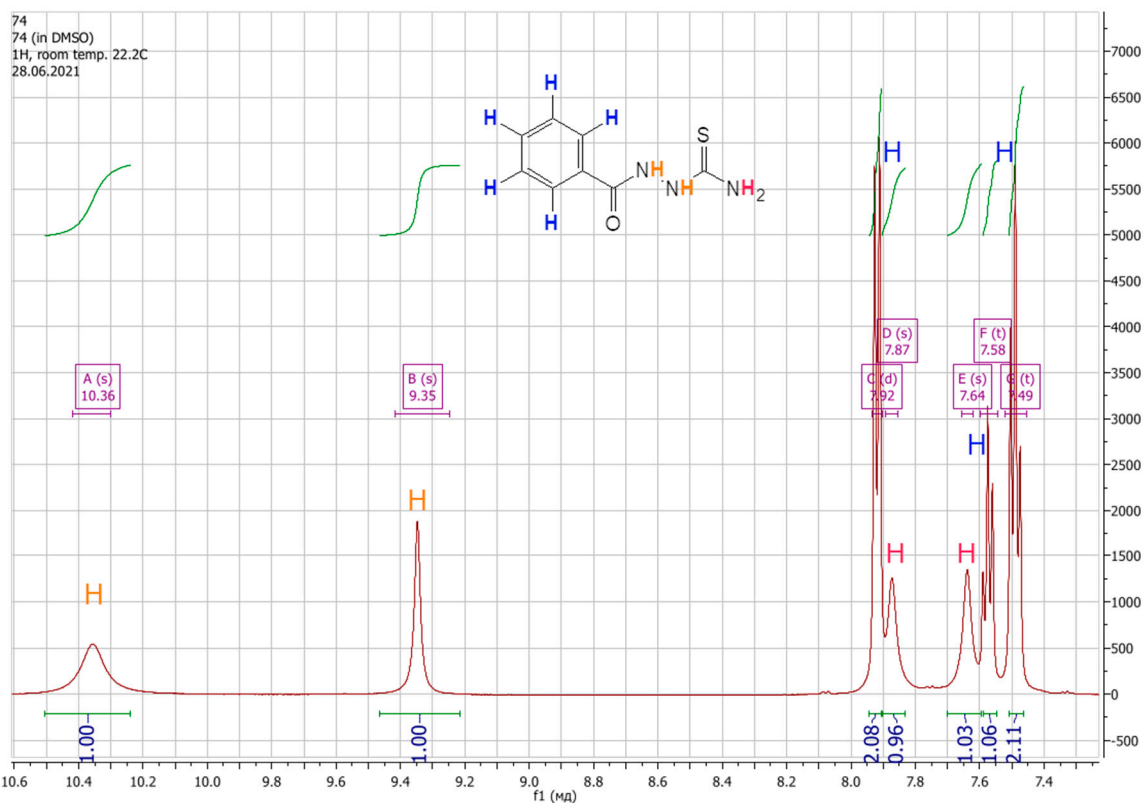

**Figure S17.**  $^1\text{H}$  NMR spectrum ( $\text{DMSO}-d_6$ ) of 2-benzoylhydrazine-1-carbothioamide (**i-1a**).
